# Supplementary material for: A Novel and Critical Role for Oct4 as a Regulator of the Maternal-Embryonic Transition
Source: PubMed Central journal article supplement (PMC2614881; doi:10.1371/journal.pone.0004109), 2008-12-31
Supplement: pone.0004109.s009.pdf [file pone.0004109.s009.pdf]

**Table S1. Antisense morpholino oligonucleotides target gene-specific sequence in the 5'UTR and/or start site. (Mismatched nucleotides are underlined.)**

| <b>Name</b>        | <b>Sequence</b>                                                                        | <b>GC content, %</b> |
|--------------------|----------------------------------------------------------------------------------------|----------------------|
| <i>Ccna2</i> -MO-1 | 5' -TCGAGGTGCCCGGCATCGCGGCTCC-3'                                                       | 76                   |
| <i>Ccna2</i> -MO-2 | 5' -CTGTCGGCGGCAGAGCGTTCACAGC-3'                                                       | 68                   |
| <i>Ccna2</i> -MM-1 | 5' -TCC <u>A</u> GGT <u>C</u> CCCCGCATCC <u>C</u> GGATCC-3'                            | 72                   |
| <i>Oct4</i> -MO    | 5' -AGTCTGAAGCCAGGTGTCCAGCCAT-3'                                                       | 56                   |
| <i>Oct4</i> -MM    | 5' -A <u>C</u> TCT <u>C</u> AAGCCAC <u>G</u> TGT <u>G</u> CAG <u>C</u> GAT-3'          | 56                   |
| <i>Oct4E4</i> -MO  | 5' -CTCCGATTTGCATATCTGGGCAGGG-3'                                                       | 56                   |
| <i>Oct4E4</i> -MM  | 5' -CT <u>G</u> CGATTT <u>C</u> CATAT <u>G</u> T <u>G</u> C <u>G</u> CAC <u>G</u> G-3' | 56                   |
| Standard control*  | 5' -TCCAGGTCCCCCGCATCCCGGATCC-3'                                                       | 72                   |

\* splice site of mutated human  $\beta$ -globin gene
