# Supplementary material for: A Novel and Critical Role for Oct4 as a Regulator of the Maternal-Embryonic Transition
Source: PubMed Central journal article supplement (PMC2614881; doi:10.1371/journal.pone.0004109), 2008-12-31
Supplement: pone.0004109.s010.pdf [file pone.0004109.s010.pdf]

**Table S2. Summary of the number of embryos tested and the number of experiments performed for each condition.**

| Experiment                           | Condition                                               | No. Injected Embryos | No. Uninjected Embryos | No. experiments |
|--------------------------------------|---------------------------------------------------------|----------------------|------------------------|-----------------|
| <i>Ccna2</i> knockdown               | <i>Ccna2</i> -MO 0.75 mM                                | 94                   | 65                     | 8               |
|                                      | <i>Ccna2</i> -MM 0.75 mM                                | 75                   | 101                    | 9               |
| <i>Ccna2</i> -MO Immunocytochemistry | <i>Ccna2</i> -MO 0.75 mM                                | 26                   | 28                     | 3               |
| <i>Ccna2</i> "gene dosage"           | <i>Ccna2</i> -MO, 0.5 mM                                | 39                   | 30                     | 3               |
|                                      | <i>Ccna2</i> -MO, 0.25 mM                               | 50                   | 29                     | 3               |
| <i>Oct4</i> knockdown                | <i>Oct4</i> -MO, 0.60 mM                                | 41                   | 37                     | 4               |
|                                      | <i>Oct4</i> -MM, 0.60 mM                                | 57                   | 30                     | 3               |
|                                      | <i>Oct4</i> -MO, 0.40 mM                                | 79                   | 25                     | 3               |
|                                      | <i>Oct4</i> -MO, 0.20 mM                                | 63                   | 30                     | 3               |
|                                      | <i>Oct4E4</i> -MO, 0.60 mM                              | 35                   | 30                     | 3               |
|                                      | <i>Oct4E4</i> -MM, 0.60 mM                              | 32                   | 30                     | 3               |
| <i>Oct4</i> -MO Immunocytochemistry  | <i>Oct4</i> -MO, 0.60 mM                                | 32                   | 22                     | 3               |
|                                      | <i>Oct4</i> -MM, 0.60 mM                                | 20                   | 20                     | 3               |
| Rescue                               | 0.036µg/µl <i>Oct4</i> mRNA+<br>0.60mM <i>Oct4</i> -MO  | 32                   | 30                     | 3               |
|                                      | 0.036µg/µl <i>EYFP</i> mRNA +<br>0.60mM <i>Oct4</i> -MO | 72                   | 30                     | 3               |
| Overexpression                       | 0.09µg/µl <i>Oct4</i> mRNA                              | 24                   | 20                     | 3               |
|                                      | 0.036µg/µl <i>Oct4</i> mRNA                             | 33                   | 25                     | 3               |
|                                      | 3.6ng/µl <i>Oct4</i> mRNA                               | 35                   | 30                     | 3               |
|                                      | 0.09µg/µl <i>EYFP</i> mRNA                              | 41                   | 20                     | 2               |
| <i>Oct4</i> -MO/Conditioned Media    | <i>Oct4</i> -MO, 0.60 mM,<br>conditioned media          | 20                   | 20                     | 2               |
|                                      | <i>Oct4</i> -MO, 0.60 mM,<br>unconditioned media        | 20                   | 20                     | 2               |
| <i>Ccna2</i> -MO gene chip           | <i>Ccna2</i> -MO, 0.75 mM                               | 60                   | 60                     | 3               |
| <i>Oct4</i> -MO gene chip            | <i>Oct4</i> -MO, 0.6 mM                                 | 60                   | 60                     | 3               |
| <i>Oct4</i> -MO single embryo QPCR   | <i>Oct4</i> -MO, 0.60 mM, 2-cell stage                  | 14-20                | 14-20                  | 3-5             |
|                                      | Control-MO, 0.60 mM, 2-cell stage                       | 5-10                 | n/a                    | 2               |
