# Supplementary material for: A Novel and Critical Role for Oct4 as a Regulator of the Maternal-Embryonic Transition
Source: PubMed Central journal article supplement (PMC2614881; doi:10.1371/journal.pone.0004109), 2008-12-31
Supplement: pone.0004109.s015.pdf [file pone.0004109.s015.pdf]

**Table S7. Oct4 candidate target genes that have putative Oct4 binding sites based on genomic sequence analysis or mouse ESC chromatin precipitation (ChIP) data(4).**

**Downregulated in Oct4 knockdown embryos:**

1700021F05Rik: RIKEN cDNA 1700021F05 gene  
2900073H19Rik: RIKEN cDNA 2900073H19 gene  
Arhgap8: Rho GTPase activating protein 8  
Cbfa2t2h: core-binding factor, runt domain, alpha subunit 2, translocated to, 2 homolog (human)  
Cdt1: chromatin licensing and DNA replication factor 1  
Dido1: death inducer-obliterator 1  
Dpm1: dolichol-phosphate (beta-D) mannosyltransferase 1  
Dppa5: developmental pluripotency associated 5  
Eif4e2: eukaryotic translation initiation factor 4E member 2  
Elovl6: ELOVL family member 6, elongation of long chain fatty acids (yeast)  
Etv5: ets variant gene 5  
Fkbp4: FK506 binding protein 4  
Gnb2l1: guanine nucleotide binding protein (G protein), beta polypeptide 2 like 1  
Hexb: hexosaminidase B  
Igf2bp1: insulin-like growth factor 2 mRNA binding protein 1  
Klf9: Kruppel-like factor 9  
Mkrn1: makorin, ring finger protein, 1  
Mtf2: metal response element binding transcription factor 2  
Myg1: melanocyte proliferating gene 1  
Pa2g4: proliferation-associated 2G4  
Pitpnc1: phosphatidylinositol transfer protein, cytoplasmic 1  
Ppm1a: protein phosphatase 1A, magnesium dependent, alpha isoform  
Rest: RE1-silencing transcription factor  
Rif1 /// LOC671598: Rap1 interacting factor 1 homolog (yeast) /// similar to Telomere-associated protein RIF1 (Rap1-interacting factor 1 homolog) (mRif1)  
Slc19a3: solute carrier family 19 (sodium/hydrogen exchanger), member 3  
Slc22a12: solute carrier family 22 (organic anion/cation transporter), member 12  
Slc25a36: solute carrier family 25, member 36  
Tfrc: transferrin receptor  
Tnpo3: transportin 3  
Ube2h: ubiquitin-conjugating enzyme E2H  
Ube2o: ubiquitin-conjugating enzyme E2O  
Zfp297b: zinc finger protein 297B

**Upregulated in Oct4 knockdown embryos**

BC022623: cDNA sequence BC022623  
2810429O05Rik: RIKEN cDNA 2810429O05 gene  
Blcap: bladder cancer associated protein homolog (human)  
Icosl: icos ligand  
Sox2: SRY-box containing gene 2  
Bcas2: breast carcinoma amplified sequence 2  
Ldlr: low density lipoprotein receptor  
Zfp219: zinc finger protein 219  
Arl4c /// LOC632433: ADP-ribosylation factor-like 4C /// similar to ADP-ribosylation factor-like protein 7  
Tcl1: T-cell lymphoma breakpoint 1  
Dcp1a: decapping enzyme  
Nes: nestin  
Rbpsuh: Recombining binding protein suppressor of hairless (Drosophila)
