# Supplementary material for: A Novel and Critical Role for Oct4 as a Regulator of the Maternal-Embryonic Transition
Source: PubMed Central journal article supplement (PMC2614881; doi:10.1371/journal.pone.0004109), 2008-12-31
Supplement: pone.0004109.s016.pdf [file pone.0004109.s016.pdf]

**Table S8. Functional categories that were enriched in downregulated genes in the *Ccna2* knockdown model.**

|    | GOBPID     | P-value | Term                                                            |
|----|------------|---------|-----------------------------------------------------------------|
| 1  | GO:0050875 | 1.1E-3  | cellular physiological process                                  |
| 2  | GO:0016568 | 4.0E-3  | chromatin modification*                                         |
| 3  | GO:0042254 | 4.0E-3  | ribosome biogenesis and assembly                                |
| 4  | GO:0006338 | 4.8E-3  | chromatin remodeling*                                           |
| 5  | GO:0007028 | 0.01    | cytoplasm organization and biogenesis                           |
| 6  | GO:0044237 | 0.01    | cellular metabolism                                             |
| 7  | GO:0007582 | 0.01    | physiological process                                           |
|    |            |         | nucleobase, nucleoside, nucleotide and nucleic acid metabolism* |
| 8  | GO:0006139 | 0.01    | acid metabolism*                                                |
| 9  | GO:0008152 | 0.01    | metabolism                                                      |
| 10 | GO:0006376 | 0.01    | mRNA splice site selection*                                     |
| 11 | GO:0006413 | 0.01    | translational initiation                                        |
|    | GO:0007001 |         | chromosome organization and biogenesis (sensu Eukaryota)*       |
| 12 | GO:0007001 | 0.01    | chromosome organization and biogenesis (sensu Eukaryota)*       |
| 13 | GO:0006996 | 0.01    | organelle organization and biogenesis*                          |
| 21 | GO:0007046 | 0.01    | ribosome biogenesis                                             |
| 22 | GO:0043170 | 0.02    | macromolecule metabolism                                        |
| 23 | GO:0051276 | 0.02    | chromosome organization and biogenesis                          |
| 24 | GO:0006325 | 0.02    | establishment and/or maintenance of chromatin                   |
| 25 | GO:0006323 | 0.02    | DNA packaging*                                                  |
| 26 | GO:0016043 | 0.02    | cell organization and biogenesis                                |
| 27 | GO:0044238 | 0.03    | primary metabolism                                              |
| 28 | GO:0000245 | 0.03    | spliceosome assembly                                            |
| 42 | GO:0006486 | 0.03    | protein amino acid glycosylation                                |
| 43 | GO:0009059 | 0.03    | macromolecule biosynthesis                                      |
| 44 | GO:0043413 | 0.03    | biopolymer glycosylation                                        |
| 45 | GO:0009101 | 0.04    | glycoprotein biosynthesis                                       |
| 57 | GO:0006364 | 0.04    | rRNA processing                                                 |
| 58 | GO:0006412 | 0.04    | protein biosynthesis                                            |
| 59 | GO:0006259 | 0.04    | DNA metabolism                                                  |
| 60 | GO:0016072 | 0.04    | rRNA metabolism                                                 |
| 61 | GO:0009100 | 0.05    | glycoprotein metabolism                                         |

Note: Highlighted categories were enriched in the *Oct4* data set as well. Asterisk indicates functional categories that were specifically enriched in *Ccna2* knockdown.
