# Supplementary material for: A Novel and Critical Role for Oct4 as a Regulator of the Maternal-Embryonic Transition
Source: PubMed Central journal article supplement (PMC2614881; doi:10.1371/journal.pone.0004109), 2008-12-31
Supplement: pone.0004109.s018.pdf [file pone.0004109.s018.pdf]

**Table S10. Functional categories that were enriched in downregulated genes in the *Oct4* knockdown model.**

|    | GOBPID     | P-value | Term                                  |
|----|------------|---------|---------------------------------------|
| 1  | GO:0006412 | 1.8E-7  | protein biosynthesis                  |
| 2  | GO:0009059 | 1.3E-6  | macromolecule biosynthesis            |
| 3  | GO:0006413 | 3.6E-6  | translational initiation              |
| 4  | GO:0009058 | 1.8E-5  | biosynthesis                          |
| 5  | GO:0044249 | 2.1E-5  | cellular biosynthesis                 |
| 6  | GO:0042254 | 2.3E-5  | ribosome biogenesis and assembly      |
| 7  | GO:0006396 | 3.0E-5  | RNA processing*                       |
| 8  | GO:0007046 | 3.3E-5  | ribosome biogenesis                   |
| 9  | GO:0016070 | 3.9E-5  | RNA metabolism                        |
| 10 | GO:0007028 | 7.0E-5  | cytoplasm organization and biogenesis |
| 11 | GO:0043037 | 1.1E-4  | Translation*                          |
| 12 | GO:0043170 | 1.2E-4  | macromolecule metabolism              |
| 13 | GO:0019538 | 1.6E-4  | protein metabolism                    |
| 14 | GO:0044238 | 3.1E-4  | primary metabolism                    |
| 15 | GO:0044267 | 3.1E-4  | cellular protein metabolism           |
| 16 | GO:0050875 | 3.3E-4  | cellular physiological process        |
| 17 | GO:0044237 | 5.3E-4  | cellular metabolism                   |
| 18 | GO:0044260 | 5.7E-4  | cellular macromolecule metabolism     |

Note: Highlighted categories were enriched in the *Ccna2* data set as well. Asterisk indicates functional categories that were specifically enriched in *Oct4* knockdown.
