# Supplementary material for: A Novel and Critical Role for Oct4 as a Regulator of the Maternal-Embryonic Transition
Source: PubMed Central journal article supplement (PMC2614881; doi:10.1371/journal.pone.0004109), 2008-12-31
Supplement: pone.0004109.s019.pdf [file pone.0004109.s019.pdf]

**Table S11. Functional categories that were enriched in upregulated genes in the *Oct4* knockdown model.**

|   | GOBPID     | P-value | Term               |
|---|------------|---------|--------------------|
| 1 | GO:0044262 | 2.0E-4  | Alcohol metabolism |
