# Supplementary material for: A Novel and Critical Role for Oct4 as a Regulator of the Maternal-Embryonic Transition
Source: PubMed Central journal article supplement (PMC2614881; doi:10.1371/journal.pone.0004109), 2008-12-31
Supplement: pone.0004109.s020.pdf [file pone.0004109.s020.pdf]

**Table S12. Some candidate Oct4-regulated genes that function in transcription, translation, RNA processing, chromatin remodeling, signaling, apoptosis and the cell cycle.**

|                                                                                                        | Gene Symbol | Fold change | False detection rate (FDR) | T. P-value |
|--------------------------------------------------------------------------------------------------------|-------------|-------------|----------------------------|------------|
| <b>POL I transcription</b>                                                                             |             |             |                            |            |
| upstream binding transcription factor, RNA polymerase I                                                | Ubtf        | 0.49        | 0.02667                    | 0.00424    |
| arginyl-tRNA synthetase                                                                                | Rars        | 0.47        | 0.03200                    | 0.00131    |
| <b>POL II transcription</b>                                                                            |             |             |                            |            |
| BTA1 RNA polymerase II, B-TFIID transcription factor-associated, (Mot1 homolog, <i>S. cerevisiae</i> ) | Btaf1       | 0.12        | 0.03834                    | 0.00833    |
| mediator of RNA polymerase II transcription, subunit 8 homolog (yeast)                                 | Med8        | 0.25        | 0.03405                    | 0.00142    |
| transcription elongation factor B (SIII), polypeptide 3                                                | Tceb3       | 0.29        | 0.01471                    | 0.00001    |
| TAF9 RNA polymerase II, TATA box binding protein (TBP)-associated factor                               | Taf9        | 0.30        | 0.02151                    | 0.00027    |
| polymerase (RNA) II (DNA directed) polypeptide H                                                       | Polr2h      | 0.42        | 0.02586                    | 0.00859    |
| elongation factor RNA polymerase II 2                                                                  | EII2        | 0.49        | 0.03696                    | 0.00098    |
| cofactor required for Sp1 transcriptional activation, subunit 2                                        | Med14       | 0.50        | 0.03794                    | 0.00156    |
| <b>POL III transcription</b>                                                                           |             |             |                            |            |
| general transcription factor IIIC, polypeptide 4                                                       | Gtf3c4      | 0.07        | 0.00000                    | 0.00002    |
| general transcription factor IIIC, polypeptide 5                                                       | Gtf3c5      | 0.34        | 0.03209                    | 0.00212    |
| BRF2, subunit of RNA polymerase III transcription initiation factor, BRF1-like                         | Brf2        | 0.34        | 0.04385                    | 0.05104    |
| general transcription factor IIIC, polypeptide 2, beta                                                 | Gtf3c2      | 0.35        | 0.03314                    | 0.00047    |
| general transcription factor III C 1                                                                   | Gtf3c1      | 0.47        | 0.03303                    | 0.00236    |
| polymerase (RNA) III (DNA directed) polypeptide A                                                      | Polr3a      | 0.55        | 0.04421                    | 0.01694    |
| polymerase (RNA) III (DNA directed) polypeptide E                                                      | Polr3e      | 0.56        | 0.03366                    | 0.00134    |
| <b>Translational control, RNA processing, and posttranscriptional regulation</b>                       |             |             |                            |            |
| <b>Translational initiation</b>                                                                        |             |             |                            |            |
| eukaryotic translation initiation factor 2C, 5                                                         | Eif2c5      | 0.09        | 0.01370                    | 0.00022    |
| eukaryotic translation initiation factor 5B                                                            | Eif5b       | 0.14        | 0.03802                    | 0.00002    |
| eukaryotic translation initiation factor 3, subunit 9 (eta)                                            | Eif3b       | 0.29        | 0.03803                    | 0.00358    |
| eukaryotic translation initiation factor 3, subunit 8                                                  | Eif3c       | 0.36        | 0.00000                    | 0.00016    |
| eukaryotic translation initiation factor 3, subunit 3 (gamma)                                          | Eif3h       | 0.42        | 0.03226                    | 0.00485    |
| eukaryotic translation initiation factor 3, subunit 4 (delta)                                          | Eif3g       | 0.47        | 0.04924                    | 0.01507    |
| integrin beta 4 binding protein                                                                        | Eif6        | 0.53        | 0.02756                    | 0.00236    |
| eukaryotic translation initiation factor 4, gamma 1                                                    | Eif4g1      | 0.59        | 0.04065                    | 0.00041    |
| eukaryotic translation initiation factor 2, subunit 1 alpha                                            | Eif2s1      | 0.60        | 0.04879                    | 0.00311    |
| eukaryotic translation initiation factor 4E /// hypothetical LOC630527                                 | Eif4e       | 0.65        | 0.03742                    | 0.00177    |
| eukaryotic translation initiation factor 3, subunit 10 (theta)                                         | Eif3s10     | 0.66        | 0.04070                    | 0.01798    |
| <b>Translational repression</b>                                                                        |             |             |                            |            |
| piwi-like homolog 2 ( <i>Drosophila</i> )                                                              | Piwi2       | 0.34        | 0.02778                    | 0.00051    |
| eukaryotic translation initiation factor 4E member 2                                                   | Eif4e2      | 0.46        | 0.02553                    | 0.01084    |

### 3' end processing

|                                                |        |      |         |         |
|------------------------------------------------|--------|------|---------|---------|
| poly (A) polymerase alpha                      | Papola | 0.10 | 0.02475 | 0.00014 |
| cleavage and polyadenylation specific factor 6 | Cpsf6  | 0.20 | 0.03256 | 0.00009 |
| cleavage and polyadenylation specific factor 4 | Cpsf4  | 0.48 | 0.03542 | 0.00233 |

### Translational termination

|                                             |      |      |         |         |
|---------------------------------------------|------|------|---------|---------|
| eukaryotic translation termination factor 1 | Etf1 | 0.36 | 0.02717 | 0.00207 |
|---------------------------------------------|------|------|---------|---------|

### Nonsense mediated decay (NMD)

|                                                       |       |      |         |         |
|-------------------------------------------------------|-------|------|---------|---------|
| eukaryotic translation initiation factor 3, subunit 6 | Eif3e | 0.21 | 0.00000 | 0.00000 |
|-------------------------------------------------------|-------|------|---------|---------|

### Other RNA binding and processing

|                                         |       |      |         |         |
|-----------------------------------------|-------|------|---------|---------|
| integrator complex subunit 7            | Ints7 | 0.10 | 0.02757 | 0.00004 |
| RNA binding motif protein 3             | Rbm3  | 0.20 | 0.03791 | 0.00037 |
| RNA binding motif protein 4             | Rbm4  | 0.42 | 0.04967 | 0.00236 |
| developmental pluripotency associated 5 | Dppa5 | 0.46 | 0.03672 | 0.00786 |
| RNA binding motif protein 5             | Rbm5  | 0.52 | 0.03415 | 0.00245 |
| proliferation-associated 2G4            | Pa2g4 | 0.70 | 0.04956 | 0.01729 |

### Pre-mRNA processing and transport

|                                                   |       |      |         |         |
|---------------------------------------------------|-------|------|---------|---------|
| Heterogeneous nuclear ribonucleoprotein U         |       | 0.18 | 0.03688 | 0.00020 |
| PRP4 pre-mRNA processing factor 4 homolog (yeast) | Prpf4 | 0.34 | 0.03828 | 0.00128 |
| RNA, U transporter 1                              | Snupn | 0.35 | 0.01681 | 0.00227 |

|                                                                                                                                          |         |      |         |         |
|------------------------------------------------------------------------------------------------------------------------------------------|---------|------|---------|---------|
| PRP38 pre-mRNA processing factor 38 (yeast) domain containing B protein phosphatase 1G (formerly 2C), magnesium-dependent, gamma isoform | Prpf38b | 0.48 | 0.04103 | 0.00548 |
| heterogeneous nuclear ribonucleoprotein A/B                                                                                              | Ppm1g   | 0.48 | 0.02463 | 0.00012 |
| heterogeneous nuclear ribonucleoprotein A1                                                                                               | Hnrpab  | 0.58 | 0.03233 | 0.00100 |
| heterogeneous nuclear ribonucleoprotein K                                                                                                | Hnrpa1  | 0.63 | 0.04981 | 0.00961 |
| heterogeneous nuclear ribonucleoprotein M                                                                                                | Hnrpk   | 0.64 | 0.04473 | 0.01239 |
|                                                                                                                                          | Hnrpm   | 0.63 | 0.04884 | 0.00724 |

### Transcriptional regulation

|                                                                                       |        |      |         |         |
|---------------------------------------------------------------------------------------|--------|------|---------|---------|
| homeodomain interacting protein kinase 3                                              | Hipk3  | 0.17 | 0.04003 | 0.00031 |
| Kruppel-like factor 9                                                                 | Klf9   | 0.17 | 0.00000 | 0.00020 |
| nuclear respiratory factor 1                                                          | Nrf1   | 0.20 | 0.01923 | 0.00073 |
| integrator complex subunit 4                                                          | Ints4  | 0.34 | 0.03520 | 0.00080 |
| homeodomain interacting protein kinase 1                                              | Hipk1  | 0.35 | 0.01786 | 0.00073 |
| Pbx/knotted 1 homeobox                                                                | Pknx1  | 0.37 | 0.03796 | 0.00484 |
| proline, glutamic acid and leucine rich protein 1                                     | Pelp1  | 0.40 | 0.02415 | 0.00573 |
| core-binding factor, runt domain, alpha subunit 2, translocated to, 2 homolog (human) |        | 0.41 | 0.04076 | 0.02903 |
| YY1 transcription factor                                                              | Yy1    | 0.43 | 0.03853 | 0.00074 |
| GATA binding protein 4                                                                | Gata4  | 0.45 | 0.03963 | 0.00325 |
| metastasis-associated gene family, member 2                                           | Mta2   | 0.51 | 0.03395 | 0.00326 |
| BCL2-associated transcription factor 1                                                | Bclaf1 | 0.54 | 0.02664 | 0.00242 |
| RE1-silencing transcription factor                                                    | Rest   | 0.62 | 0.03827 | 0.00983 |
| ets variant gene 5                                                                    | Etv5   | 0.50 | 0.04900 | 0.00576 |
| makorin, ring finger protein, 1                                                       | Mkrn1  | 0.58 | 0.03793 | 0.00310 |

### Chromatin remodeling, epigenetic regulation

|                                                                                      |        |      |         |         |
|--------------------------------------------------------------------------------------|--------|------|---------|---------|
| jumonji domain containing 1B                                                         | Kdm3b  | 0.14 | 0.03770 | 0.00132 |
| jumonji, AT rich interactive domain 1C (Rbp2 like)                                   | Kdm5c  | 0.23 | 0.01408 | 0.00075 |
| sirtuin 1 ((silent mating type information regulation 2, homolog) 1 (S. cerevisiae)) | Sirt1  | 0.28 | 0.01136 | 0.00002 |
| methyltransferase like 2                                                             | Mettl2 | 0.37 | 0.03333 | 0.00010 |

|                                                                                                                                                                                   |       |      |         |         |
|-----------------------------------------------------------------------------------------------------------------------------------------------------------------------------------|-------|------|---------|---------|
| jumonji domain containing 1A                                                                                                                                                      | Kdm3a | 0.38 | 0.04874 | 0.00764 |
| SWI/SNF related, matrix associated, actin dependent regulator of chromatin, subfamily c, member 1                                                                                 | Rsc8  | 0.41 | 0.03665 | 0.01049 |
| jumonji, AT rich interactive domain 1B (Rbp2 like)                                                                                                                                | Kdm5b | 0.57 | 0.03738 | 0.00388 |
| eukaryotic translation initiation factor 2, subunit 3, structural gene X-linked<br>/// similar to eukaryotic translation initiation factor 2, subunit 3, structural gene X-linked |       | 0.57 | 0.04905 | 0.00183 |

### Histone H3-specific HAT activity

|                                                             |        |      |         |         |
|-------------------------------------------------------------|--------|------|---------|---------|
| general transcription factor IIIC, polypeptide 4            | Gtf3c4 | 0.07 | 0.00000 | 0.00002 |
| general transcription factor IIIC, polypeptide 5            | Gtf3c5 | 0.34 | 0.03209 | 0.00212 |
| GCN5 general control of amino acid synthesis-like 2 (yeast) | Gcn5   | 0.34 | 0.02525 | 0.00159 |
| general transcription factor IIIC, polypeptide 2, beta      | Gtf3c2 | 0.35 | 0.03314 | 0.00047 |
| general transcription factor III C 1                        | Gtf3c1 | 0.47 | 0.03303 | 0.00236 |
| H3 histone, family 3A                                       | H3f3a  | 0.53 | 0.04006 | 0.00865 |

### Signaling pathways (Fgf4, Bmp, Toll, Egf, Mapk, Erk, Igf2, Amp)

|                                                                                                  |        |      |         |         |
|--------------------------------------------------------------------------------------------------|--------|------|---------|---------|
| fibroblast growth factor 4                                                                       | Fgf4   | 0.09 | 0.02591 | 0.00088 |
| signaling intermediate in Toll pathway-evolutionarily conserved                                  | Ecsit  | 0.17 | 0.01935 | 0.00000 |
| protein kinase, AMP-activated, gamma 1 non-catalytic subunit                                     | Prkag1 | 0.19 | 0.03786 | 0.00010 |
| insulin-like growth factor 2 mRNA binding protein 1                                              | Imp1   | 0.26 | 0.04930 | 0.00047 |
| bone morphogenetic protein receptor, type 1A                                                     | Bmpr1a | 0.35 | 0.02347 | 0.00005 |
| fibroblast growth factor receptor-like 1                                                         | Fgfr1  | 0.34 | 0.03349 | 0.01815 |
| interleukin 17 receptor D                                                                        | Il17rd | 0.35 | 0.01961 | 0.00052 |
| mitogen activated protein kinase 1                                                               | Mapk1  | 0.39 | 0.04889 | 0.00710 |
| splicing factor, arginine/serine-rich 15 /// similar to splicing factor, arginine/serine-rich 15 | Sfrs15 | 0.47 | 0.02113 | 0.00047 |
| protein phosphatase 1A, magnesium dependent, alpha isoform                                       | Ppm1a  | 0.46 | 0.02525 | 0.00280 |
| protein kinase C, delta                                                                          | Prkcd  | 0.45 | 0.03465 | 0.02184 |
| insulin-like growth factor 2 receptor                                                            | Igf2r  | 0.53 | 0.04738 | 0.00600 |

### Apoptosis

|                                           |       |      |         |         |
|-------------------------------------------|-------|------|---------|---------|
| junction-mediating and regulatory protein | Jmy   | 0.21 | 0.00000 | 0.00036 |
| sphingosine-1-phosphate phosphatase 1     | Sgpp1 | 0.23 | 0.01538 | 0.00160 |
| cathepsin B                               | Ctsb  | 0.28 | 0.00000 | 0.00024 |
| death inducer-obliterator 1               | Dido1 | 0.46 | 0.03440 | 0.00196 |

### Cell cycle, DNA replication, DNA repair, cell division, chromosome segregation, cell growth, cell size

|                                                                                                                                       |        |      |         |         |
|---------------------------------------------------------------------------------------------------------------------------------------|--------|------|---------|---------|
| origin recognition complex, subunit 4-like ( <i>S. cerevisiae</i> )                                                                   | Orc4l  | 0.17 | 0.01852 | 0.00383 |
| purine rich element binding protein B                                                                                                 | Purb   | 0.29 | 0.02669 | 0.00019 |
| chromosome segregation 1-like ( <i>S. cerevisiae</i> )                                                                                | Cse1l  | 0.34 | 0.03254 | 0.00002 |
| minichromosome maintenance deficient 5, cell division cycle 46 ( <i>S. cerevisiae</i> )                                               | Mcm5   | 0.34 | 0.01852 | 0.00004 |
| kinesin family member 11                                                                                                              | Kif11  | 0.34 | 0.01938 | 0.00170 |
| replication factor C (activator 1) 2                                                                                                  | Rfc3   | 0.40 | 0.04420 | 0.00919 |
| kinesin family member 22                                                                                                              | Kif22  | 0.42 | 0.02667 | 0.00033 |
| protein phosphatase 2 (formerly 2A), catalytic subunit, beta isoform                                                                  | Ppp2cb | 0.43 | 0.03243 | 0.00658 |
| centromere protein E                                                                                                                  | Cenpe  | 0.54 | 0.03801 | 0.00299 |
| Rap1 interacting factor 1 homolog (yeast) /// similar to Telomere-associated protein RIF1 (Rap1-interacting factor 1 homolog) (mRif1) | mRif1  | 0.63 | 0.04515 | 0.00228 |
