# Supplementary material for: A Novel and Critical Role for Oct4 as a Regulator of the Maternal-Embryonic Transition
Source: PubMed Central journal article supplement (PMC2614881; doi:10.1371/journal.pone.0004109), 2008-12-31
Supplement: pone.0004109.s021.pdf [file pone.0004109.s021.pdf]

**Table S13. Gene-specific primers and Taqman® probes that were used in q-PCR experiments.**

Gene-specific primers used for Oct4 (302 bp product) were GGCGTTCTCTTTGGAAAGGTGTT (forward) and CTCGAACCACATCCTTCTCT (reverse), and those for *Ccna2* (212 bp product) were GATAGATTCCTCTCCTCCATG (forward) and TCACACACTTAGTGTCTCTGG (reverse).

| Probe Name | Applied Biosystems Assay ID/ Catalog No. | Probe Name    | Applied Biosystems Assay ID/ Catalog No. |
|------------|------------------------------------------|---------------|------------------------------------------|
| Bmpr1a     | Mm01208758_m1                            | Mouse b-actin | 4352341E                                 |
| Pou5f1     | Mm00658129_gH                            | Mouse b-actin | 4352933E                                 |
| Klf9       | Mm00495172_m1                            | Mouse Gapdh   | 4352932E                                 |
| Fgf4       | Mm00438917_m1                            |               |                                          |
| Sall4      | Mm01240680_m1                            |               |                                          |
| Bclaf1     | Mm00464127_m1                            |               |                                          |
| Yy1        | Mm00456392_m1                            |               |                                          |
| Pknox1     | Mm00479320_m1                            |               |                                          |
| Gata4      | Mm00484689_m1                            |               |                                          |
| Mta2       | Mm00488671_m1                            |               |                                          |
| Rest1      | Mm00803268_m1                            |               |                                          |
| Tcf15      | Mm00626495_m1                            |               |                                          |
| Dppa5      | Mm01171664_g1                            |               |                                          |
| Bmpr1a     | Mm00477650_m1                            |               |                                          |
| Fgfr1      | Mm00475318_g1                            |               |                                          |
| Il17rd     | Mm00460340_m1                            |               |                                          |
| Ubtf       | Mm00456972_m1                            |               |                                          |
| Gtf3c4     | Mm00557022_m1                            |               |                                          |
| Gtf3c2     | Mm00510828_m1                            |               |                                          |
| Polr3e     | Mm00491765_m1                            |               |                                          |
| Polr3a     | Mm00805896_m1                            |               |                                          |
| Eif3b      | Mm00659801_m1                            |               |                                          |
| Eif3s10    | Mm00468721_m1                            |               |                                          |
| Piwil2     | Mm00502383_m1                            |               |                                          |
| Eif4e      | Mm00725633_s1                            |               |                                          |
| Polr2h     | Mm01344328_g1                            |               |                                          |
| Eif2c5     | Mm01305462_m1                            |               |                                          |
| Eif3c      | Mm01278697_m1                            |               |                                          |
| Eif5b      | Mm01227234_m1                            |               |                                          |
| Papola     | Mm01334253_m1                            |               |                                          |
| Eif3e      | Mm01700222_g1                            |               |                                          |
| Sox2       | Mm03053810_s1                            |               |                                          |
